# Supplementary material
Source: ML conference proceedings conference paper supplement (https://openreview.net/forum?id=g_PPHV_GkX)
Supplement: supplementary_material [file attachment]

## 8 Appendix

### 8.1 P-data, an abstract representation for rope states

A common way to abstract the state space in knot tying is using the **P-data** representation [24]. The P-data representation translates a rope configuration to a matrix of discrete values that depends on the number of link intersections. The P-data algorithm stages are: (1) project the 3D rope onto a 2D on the horizontal plane. (2) Select rope direction by defining the head and tail of the rope. (3) Move from head to tail and count the number of intersections along the path, starting from 1 to N. Those intersections are also called crosses. Finally, (4) each intersection gets **over/under** value based on which segment is over the other in the height dimension and also gets a **sign** plus/minus. The sign defined as

$$sign = \frac{\vec{l}_{over} \times \vec{l}_{under}}{|\vec{l}_{over} \times \vec{l}_{under}|} \cdot \vec{e}_z,$$

where  $e_z$  is the unit normal of the horizontal plane, and  $l_{over}$  and  $l_{under}$  are the two strands directional vectors. Examples of P-data of projected knots in Figure 2.

### 8.2 Collection process

We maintain a set of configurations we have already seen during data collection and their respective number of crosses, i.e.  $D_Q = \{(q_i, \text{Cross}(\text{Top}(q_i)))\}_i$ . For every data collection iteration  $t$ , we load the simulation with a configuration sampled from  $D_Q$ ,  $q_t$ , take a random curve  $c_t$ , and reach a new configuration  $q_{t+1}$  with a topological state  $s_{t+1}$ . If the number of crosses in  $\text{Cross}(s_{t+1}) > \text{Cross}(s_t)$  the transition  $(q_t, s_t, c_t, q_{t+1}, s_{t+1})$  is added to  $D$ , and the configuration  $q_{t+1}$  is added to  $D_Q$ .

### 8.3 TWISTED Algorithm

Our TWISTED algorithm in algorithm 1

---

#### Algorithm 1 TWISTED algorithm

---

**Input**  $q_{init}$  Initial configuration state and  $s_g$  topological goal state

**Output** Low-level plan if found

```

1:  $init : T, \mathbf{P}$  ▷ see data structures
2:  $s_{init} = \text{Top}(q_{init})$ 
3: populate  $\mathbf{P}$  with plans from  $s_{init}$ 
4: while Not timeout do
5:    $s_{selected} = \text{SelectTopologicalState}()$ 
6:    $P_{selected} = \text{SelectPlan}(s_{selected})$ 
7:    $q_{selected} = \text{SelectConfiguration}(s_{selected})$ 
8:    $\text{PlanFound} = \text{FollowPlan}(q_{selected}, P_{selected})$ 
9:   if  $\text{PlanFound}$  then
10:     $\text{ReturnPlan}$ 
11:   else
12:     $\text{RandomExpand}()$ 
13:   end if
14: end while
```

---

### 8.4 Inverse model

Our inverse model architecture in figure 4

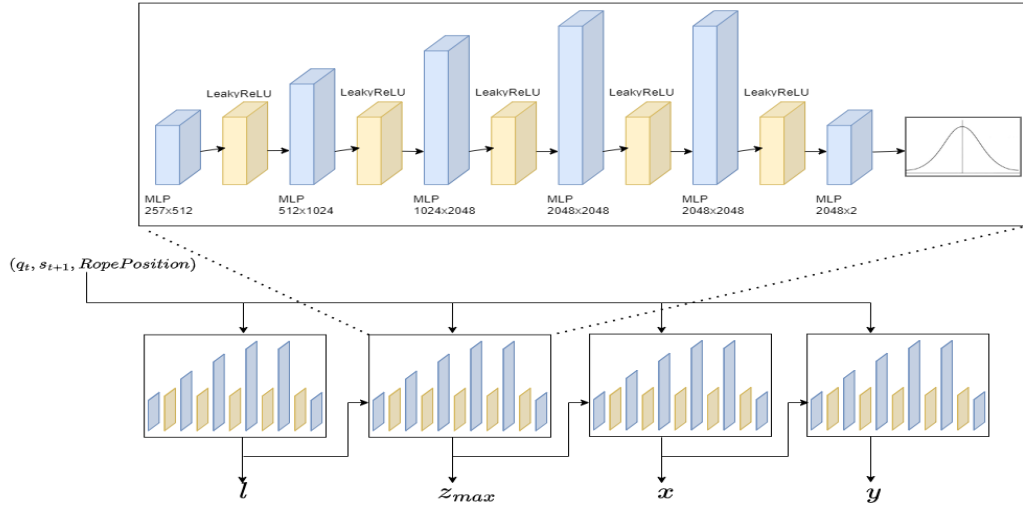

Figure 4: Inverse model - Auto-regressive Stochastic Network. The network predicts an action in an auto-regressive manner: first it predicts the link index  $l \in [1, L]$ , then the height of the curve  $z_{max}$ , finally it predicts the  $x$  and  $y$  coordinates of the curve. All predictions are stochastic (Multinomial for link index, and Gaussian otherwise). Besides the previous elements, the input of each element includes the current configuration  $q_t$ , the next topological state  $s_{t+1}$ , and the link positions of all the rope links. The weights of the sub-components are not shared.
